# Supplementary material
Source: publisher figshare collection journal article supplement (https://gsajournals.figshare.com/articles/dataset/_/6122270)
Supplement: Supplementary file 1 [file 2]

## Sheet: 50 monomorphic markers
Supplementary Table 2
Fifty monomorphic SNP markers on the 27.8 Mb -33.9 Mb region on 2AS in emmer wheat
Markers	Sequence names	Sequences
SNP53717456	BS00065449_51	CGAGTCGTCCTTATGCAAGACCATCATCCCTTGGCATATCTCAGTAAGCCTGCTCTGCTCCAAGAATTTGGGATTATCAGCTTATGAGAAGGAATGCTTATC
SNP36622376	BobWhite_c12658_649	AAATTCATCACGAAACTGAAGATGATGTCGAATGAGGAGCTGTCGCTGGATCGATCTGCAAATATAACAATAGGAGGGACACGTCGGTTGTAATTATCTACT
SNP60610325	Excalibur_c37040_856	GGGCATGCTGTAGGGCGGCCCTCCTTTTGGTATCTCGTAATCTAGTGTGTAGCAGAAACGTTGGCTAGCAGCTGTAGCGTGTCTTATGACATTTATTGGACC
SNP20695369	RAC875_c54668_71	CACGCCCACCTACGGCGGCGGTGGTGGCGGTGGATACCACGGACACCACTAGAGTCCGGTCTACCACCCTCCCGCCAAGCGATGAAATTGGTAAAGTTCCTC
SNP41616420	GENE-1177_195	ATTATATAGAATACTCCACTTTGTAAATGCATGATGTTGCTCTGCTCACTTGTTGTTCTGCCATGAACGTACCRCAGGTCTTCAGGTGGCGATCAAGT
SNP23655481	RAC875_rep_c111906_144	CATTTAGCACTCAGCCACCGCAGACTGCTGAGGCCCCAGACAACATGGCTAGTCAAATACAGTCAGCGTTACTAGTTTTTTTGCAACCCTGGGCTCCAAACC
SNP34651479	Tdurum_contig42153_4896	CAGTTTAAATCGCACATTGGTTGAGGGCAGAAATGTCCAAACTATTGGTTTGAACTTGTTGCTTCTGGTTTGATTCTTGATGTTCATCTTCAGTCTCGAGCC
SNP11738312	Tdurum_contig42153_4505	GCATAGGATGGCTTTTGTTAAAGCTTTCAGCTCTATGGATCATGTACGGAACATTCCTAAATTCTACGAATCTTGTTGATGACTGTCGAGTTTAGAGATGGA
SNP63699410	Ku_c33031_203	GTTGACTCTTGTTCTGTTCAGGATCGTCGCACACACACTTTGGTTGGGGCTCGGCCCTCGCCGCCGTGACTCTCAGGGTCTTTAGTTAGACTAGCTTCATGT
SNP26718455	Tdurum_contig42153_3105	TCTGTGTTAAACAGGATGGAGTCTGTTTGGCTTCTTTCGCAGAGACATCCAGGAAATTATTGGGCGAGGATGCTATTGAATCTGTCATCTCAGCTGTAAGAT
SNP48801495	Kukri_c63732_593	AGTACAAATTCAATAAAAAAATGCTCGAGCTGATATGTTGAGAGAAAGCATCAGAAGCAGTTTTTGCTGCATGTGATGCTGCACATCGACAATGGGCTAAGC
SNP22713394	Tdurum_contig42153_420	ATCTAAAGGCTAAGAACTGGTAGGGAGTGATTAGTTAGTAGTACCTGCACTCCATTGGCTTCGTAAATTAATTCAATGCCAAGAAGGCATGGGCCATGCTAT
SNP19630329	RAC875_c62936_139	CTACCAGATACCTGCAATCTGGAAAAGACATGGTTGAGCATACTCAGATCAGGCGAGTGGTACCAGCGGATGGAAGATGCGGTCGGAGAACCATCAAGAATC
SNP35709376	Kukri_c31508_91	AGAACCATCAAGAATCCCGGAGGGCCAGTACCCGGAGTAGAAGAAAACCATCCACTAATAGAAGTTTTTTGCTCGTTCAAGCCCTCATTTCAAATGGATGAA
SNP14728352	GENE-0717_28	TGTAGCATCCACTACCAGCGAAATGTATCTCTTCTAAGTTGTGAATGCAGACCTACAGGAAGTTAACAATAACAATGAA
SNP45737352	Tdurum_contig42510_512	AGCAACCCCGACATCATGCTGCTCGCCGCGCGGGCCCTGACCCACCTCTGTCGACGTGCTTCCGTCGTCCTGCTCTGCCGTTGTGCACTATGGCGCCGTCGC
SNP27781336	Kukri_c42095_196	TCCTGAGGATGGGGTATGGGCTGCGGTTTGTGAGATAGATTGCCTTATGTACGTTAACATTGAGATGAACTGTTTAATTGGGGTGTAGTATGTGGAAGCCAT
SNP21656328	Excalibur_c13057_1203	TCATCTACGGGATCTGGTGATGGTGCAGGCTCGCCATTGTCGTCATCGTCAGTCCTGCTTAGCTTCACCATTCAAATCAAGATCAGAAGGCCTCTTCCATTC
SNP44628455	BobWhite_rep_c64012_557	CTGCGGACATCATCATCCTTGCCAAGGTTGAAGAGCTTCTTGATCTTGGAAGGCCCTCTTGGGTCCCCTCATCCTGGGCTTCTCAGTGTCAGTAAGGCCTGG
SNP27788419	GENE-3025_152	ATCCTGCTTGCCCACTTTCACTTTTCTTTAGGAAAAATATTCTTTCCTTGTGAATATCATAGTGCTTGTCTGAGCAGTTTTGTGTCTCTCATTTACTTCTTT
SNP16727370	BobWhite_rep_c64012_389	TACTCTGCAGCCTCTGACTTCTTCTTTGCGATCCTCTTCTTCTTGTCTGCTGATTCTGGCGCGCTTCCTCTGGAGTGTCAAGGGAGTCACAAGGCGCTGGAT
SNP33787418	CAP12_rep_c4894_95	ATATCACACTGGTGTTGTATATGTGTAGCCGGTGCTAGAATTTACATATGTCATGCTCCACAACCTATGTTCGTACAAACACAGATCATACCGAACGAAAAA
SNP19732476	CAP7_s13101_255	GTCTTTTGTGAACTTCACTTTTGTCCAGGACTCTGCTTTCCGACCAGAGCAGTATTTTTCGTTCGGTATGATCTGTGTTTGTACGAACATAGGTTGTGGAGC
SNP45714405	BobWhite_c56683_184	GTCTGGCAAGGCCTAAACTACGAGTTGAAGCAATGGCCTATGTATGATTGTCCTTTTGTGAACTTCACTTTTGTCCAGGACTCTGCTTTCCGACCAGAGCAT
SNP52788485	RAC875_c57608_128	CGTCGGTGCACCCGAACATAGGCAGCTTCCACATTGTCCAGTATCGGCCGTGCGTAGTACCCGGGGGAGCTGTTGTGCTCAGAAAGGATTTGGGTTACAACC
SNP70751509	CAP11_rep_c9060_520	ATATGGTCTGTGTATGTAAGTACGAACATAGGTTCTCGAGCATGCATATGTCAAATTCTAGAACCGGCTACACATATACAAAACCTGTGTGATATTTATTAT
SNP11654371	BobWhite_c59161_181	TCACTTTTGTCCACGACTCTGCTGGACGACCAGAGCATATTTTTCATTCTAGTATGGTCTGTGTATGTATGTACGAACATAGGTTCTCGAGCATGCATATGT
SNP20798503	wsnp_CAP8_c2110_1147974	GAACATAGGTTCCTACATACATACACAAATCATATAGAACAAAAGGTATGCTCCGGTCGGAAAGCAGAGTCGTGCAACAGAGGTCGTGGACAAAAGTGAAAGTTCACAAAAGATCTTCATATGAGATAGGCCATTGTTTCAACTCATAGTTTAGGCCTTGCCGGACTCCTCGCAACCCGGTGGCCTGAAGGCGATGAAGCTG
SNP32732321	BobWhite_c58481_104	AAACTATGAGTTGAAACAATGGCCTATCTCATATGAAGATCTTTTGTGAATCTTCACTTTTGTCCACGACCTCTGTTGCACGACTCTGCTTTCCGACCGGAG
SNP55679346	BobWhite_rep_c55823_451	WCAGTGCAAAAACCGTCAAAGGAGGGTTGTCCGTGACGGATTTATAATCCAGTCATGTATATCGCGTCATAATTTGACAACTGTACCACCATGACTGATCCT
SNP44613492	CAP8_rep_c8022_270	GCAAGGCCTAAAGTGCAAGTCCGATATACACTACAAGAATCTTGTTAATCTCATGACGGATACAGTCTGTCATGGAACAGTGCAAAACCGTCAAGGAGGGTT
SNP42754380	BobWhite_rep_c55823_162	AACAGCTCCCCAGGGTACTACGACGGTCGATACTGGACAATGTGGAAGCTTGCCTATGTTCGGGTGCACTGACGCCACGCAGGTGCTCAACGAGGYGGAGGA
SNP72625349	BobWhite_rep_c55823_75	CTCCTTAAGCAGGTCGACTACCTGATCCGCTCCAAGTGGGTGCCCTGCCTTCGAGTTCAGCAAGGTTGGCTTCGTCTTCCGTGAGCACAACAGCTCCCCAGG
SNP51734377	BobWhite_rep_c65688_384	AGCAAGGTTGGCTTCGTCTTCCGTGAGCACAACAGCTCCCCCGGGTATTATCGACGGTCGATACTGGACAATGTGGAAGCTGCCTATGTTCGGGTTGACRSC
SNP65660500	BobWhite_rep_c50942_265	CAGGTGTGGCCAATTGAGGGCATCAAGAAGTTCGAGACCCTGTCTTACTTAGCCACCCCTCTCCACGGAGGCCCTCCTGAAGCAGGTCGACTACTTGATCCG
SNP54708503	Ex_c30524_177	CATATATTCACATATGAGTAGAACGAGAAGTAAAACTGAGAAAGCAGAGCTCGCCGACAAATGTGWACTAACATGACATGTATATCGGTTACTTCAACTTGC
SNP31648372	RAC875_c11652_544	GTGYTCCTCCATTGCCCAATCTTCTAATTGGCATTGGAGTGACATGATTGTCAAATTAGTATATATAGATACACTAGAGACTGACTAGGTTAGCATAGACAA
SNP41788408	Tdurum_contig54657_726	ACTTTGTTAATGGCATACCACTCAGTGACTCTGGTTCTCCTATGGACTACAGACAAGTGGATATCCACACTTGATCCGTTGGTTGGCAAGATGTAGGGAGCT
SNP37770444	Tdurum_contig54657_696	GTGCACGAGGCGTCACCGGGACACCCTACTACTTTGTTAATGGCATACCATCTCAGTGACTCTGGTTCTCCTATGGACTACAACAAGTGGATATCCACACTT
SNP44669342	BobWhite_c2022_245	ACACCAAAACAAGAGCAGCGGTGGTCGCCGAAATAGCTAACAACCTTGTCAGCCCCTGTCATTGGTGAGGCCAACTTGGCAGCATACAGAGCGGGCTTCAAC
SNP34646360	CAP11_c2293_200	GCCAGGATGAATGAGCTTTCTGCTCTGGGCTTCCTCTTAAGAATCATAGAAGTATGTAAGCCAGTGGTACCAACAAATATACTCACTCACGGTCGATCGATC
SNP56740473	BS00011425_51	GGAACCGATCTTGACAGGGCTACTAATGAACTTGTGATACGCGTGCAACCAGGATGAAGGAATTTACCTAAAGATTAACAACAAGATTCCTGGTCTTGGTAT
SNP50690508	Ra_c44994_415	AAGATCATGTATATACATTTAGAAGTACAGTACAGTTACTACACTACTGTAGATGCCTATATACACTTGTAGAATAATTCCAACATTTATTTTATTTATCTG
SNP48796320	GENE-1417_537	GAAGTCAAGAAAGTCCTTAAATGATCAGATGATACCAACGCATCCAATTCAGGAATGTG
SNP32630464	GENE-1417_406	GTAATTATTGTGGTTGAGTGAAATGTTGCCATCTTATGTATATATAGTGTTCTTAACAAATAATGTTAATGCTTTTTCTTTGGTCACTTGTTCAGATGGATC
SNP32781486	wsnp_Ex_c61879_61748626	GTTGCCTTTGTATACTCAAATTGCGGTGCGGTTTGCTGAATTGCATGACACTTCCCTTAGAATGGCTGCTAAGGGTGTGATTAAGAAGGTTGTAGACTGGAGAAGATTCTAGGTCTTTCTTCTACAAGAGATTACGGAGGAGGATATCCGAGGACGTTCTTGCAAAGGAAATTAGAGGTGTAAGTGGCAAGCAGTTCTCTCA
SNP18736447	Kukri_c27040_309	GTTGAGGAACTATTCAGTGATGGCATTCAGTCTGATGTGATTGAGCGCCTTGCGCCAACAACATAGTAAAGATCTCCAGAAGGTTGTAGACATTGTGTTGTC
SNP38667411	BobWhite_c24495_465	TGTTGCCTTGGATGGTAGTGCTTCCACGCCATTTGGCTCAACCTTAGCCCTGCTTCGGCTTCGGAACTTCCTCCTCATCTTCATTAAATGAATACGCAACAT
SNP70729453	BobWhite_c24495_508	TTAGCCCTCTTCGGCTTCGGAACTTCCTCCTCATCTTCATTAAATGAATATCGCAACATCTTTAACAGCCTTGGAGCAATTGGTCAAGATCTCTGCAGCCTT
SNP64730507	RAC875_c45558_266	GTCATCCATCAGGTCAATGCCATCCCCGTTCTTGCTTTTCACATGCAAGATCAATATCAGAACCAACAGCCTCACTTGCAGCATCCTTGAGGGTTCCAATGA
